# Supplementary material
Source: Springer Nature journal article supplement (https://www.springermedizin.de/resource/supplementary/12885_2012_3537_MOESM1_ESM.pdf/9463996)
Supplement: MOESM1 [file 9463996]

## Case group

## Control group

Database of patients with diagnosis of ICD9 140-208 during 1997-2007 retrieved from NHRI

The Longitudinal Health Insurance Database 2005 (LHID2005, years 1996-2006)

Identify 21460 colon cancer patients aged 18-100 years old with the Registry for Catastrophic Illness

Identify 79331 subjects free of diagnosis for cancers and benign lesions

matched with gender and birth year

21460 colon cancer patients and 79331 controls

Case-control study
